# Supplementary material
Source: Copernicus journal article supplement (doi:10.5194/egusphere-2026-3798)
Supplement: Supplementary file 1 [file egusphere-2026-3798-supplement.pdf]

Supplementary material for Hydrology and Earth  
System Sciences (HESS) manuscript submission:  
Generalization of Deep Learning Models to Ungauged  
Glacierized Basins: Evidence from Alpine, Patagonian,  
and North American Catchments

Meelisha Maharjan<sup>1</sup>, Colin J. Gleason<sup>1</sup>, Casey Brown<sup>1</sup>

<sup>1</sup>University of Massachusetts, Amherst, 01002 Massachusetts, USA

*Correspondence to:* Meelisha Maharjan (mmaharjan@umass.edu)

**Contents of this file**

Figures S1 to S10

Tables S1 to S6

Table S1

*List of Large sample datasets and number of respective basins (Kratzert et al., 2023)*

| <b>Dataset</b>           | <b>A</b>    | <b>M</b>    | <b>G</b>   | <b>Source</b>                   |
|--------------------------|-------------|-------------|------------|---------------------------------|
| CAMELS-US                | 462         | 155         | 29         | (Newman et al., 2015)           |
| CAMELS-AUS               | 61          | 30          | -          | (Fowler et al., 2021)           |
| CAMELS-BR                | 193         | 80          | -          | (Chagas et al., 2020)           |
| CAMELS-CH<br>(extension) | 115         | 94          | 51         | (Höge et al., 2023)             |
| CAMELS-CL                | 7           | 7           | 6          | (Alvarez-Garreton et al., 2018) |
| CAMELS-GB                | 274         | 19          | -          | (Coxon et al., 2020)            |
| HYSETS                   | 1401        | 420         | 118        | (Arsenault et al., 2020)        |
| LamaH-CE                 | 332         | 215         | 79         | (Klingler et al., 2021)         |
|                          | <b>2845</b> | <b>1020</b> | <b>283</b> |                                 |

Table S2a

*Meteorological Forcing Data and Model State Variable as Inputs for LSTM & Graph WaveNet (Muñoz-Sabater et al., 2021)*

| <b>Meteorological Feature</b> | <b>Aggregation</b>   | <b>Unit</b>            |
|-------------------------------|----------------------|------------------------|
| Precipitation                 | Daily sum            | <i>mm/day</i>          |
| Air Temperature               | Daily min, Daily max | $^{\circ}\text{C}$     |
| Surface Pressure              | Daily mean           | <i>KPa</i>             |
| Surface net solar radiation   | Daily mean           | <i>Wm<sup>-2</sup></i> |
| <b>Model State Feature</b>    | <b>Aggregation</b>   | <b>Unit</b>            |
| Snow water equivalent         | Daily mean           | <i>mm/day</i>          |

Table S2b  
*Meteorological Forcing Data for  $\delta$ HBV*  
 (Muñoz-Sabater et al., 2021)

| Feature               | Aggregation | Unit          |
|-----------------------|-------------|---------------|
| Precipitation         | Daily sum   | <i>mm/day</i> |
| Air Temperature       | Daily mean  | <i>°C</i>     |
| Potential evaporation | Daily sum   | <i>mm/day</i> |

Table S3  
*Static attributes list (Anon, 2019)*

| Group                    | Description                    | Aggregation            | Unit                     |
|--------------------------|--------------------------------|------------------------|--------------------------|
| <b>Physiography</b>      | Elevation                      | Spatial mean/min/max   | <i>m above sea level</i> |
|                          | Terrain slope                  | Spatial mean           | <i>° (x 10)</i>          |
|                          | Stream gradient                | Mean of reach segments | <i>dm/km</i>             |
| <b>Metadata</b>          | Area                           |                        | <i>km<sup>2</sup></i>    |
|                          | Gauge latitude                 |                        | <i>deg</i>               |
|                          | Gauge longitude                |                        | <i>deg</i>               |
| <b>LandCover</b>         | Forest cover extent            | Spatial mean           | <i>% cover</i>           |
|                          | Cropland extent                | Spatial mean           | <i>% cover</i>           |
|                          | Wetland extent                 | Spatial mean           | <i>% cover</i>           |
|                          | Permafrost extent              | Spatial mean           | <i>% cover</i>           |
| <b>Soils and Geology</b> | Sand fraction in soil          | Spatial mean           | <i>%</i>                 |
|                          | Silt fraction in soil          | Spatial mean           | <i>%</i>                 |
|                          | Clay fraction in soil          | Spatial mean           | <i>%</i>                 |
|                          | Organic Carbon content in soil | Spatial mean           | <i>tonnes/hectare</i>    |
|                          | Soil water content             | Annual mean            | <i>%</i>                 |
|                          | Karst area extent              | Spatial mean           | <i>% cover</i>           |

|                           |                                            |                                          |         |
|---------------------------|--------------------------------------------|------------------------------------------|---------|
| <b>Climate attributes</b> | Aridity index                              | Ratio of mean PET and mean precipitation | -       |
|                           | Fraction of precipitation falling as snow  | -                                        | -       |
|                           | Mean annual moisture index in range [-1,1] | -                                        | -       |
|                           | Snow cover percent                         | Annual max, Annual mean                  | % cover |

**Table S4**  
*Overview of RGI Classification, Country and Mountain ranges of the Glacial High Mountain Catchments (G)*

| <b>First Order RGI Region</b> | <b>Second Order RGI Region</b>  | <b>Country</b>                | <b>Mountain Range</b>    |
|-------------------------------|---------------------------------|-------------------------------|--------------------------|
| 02 – Western Canada and USA   | 02-2 (S Coast Ranges)           | Canada, USA                   | S Coast Ranges           |
|                               | 02-3 (N Rocky Mts)              |                               | N Rocky Mts              |
|                               | 02-4 (Cascade Ra and Sa Nevada) |                               | Cascade Ra and Sa Nevada |
|                               | 02-5 (S Rocky Mts)              |                               | S Rocky Mts              |
| 11 – Central Europe           | 11-1 (Alps)                     | Austria, Germany, Switzerland | Alps                     |
| 17 – Southern Andes           | 17-2 (C Andes)                  | Chile                         | C Andes                  |

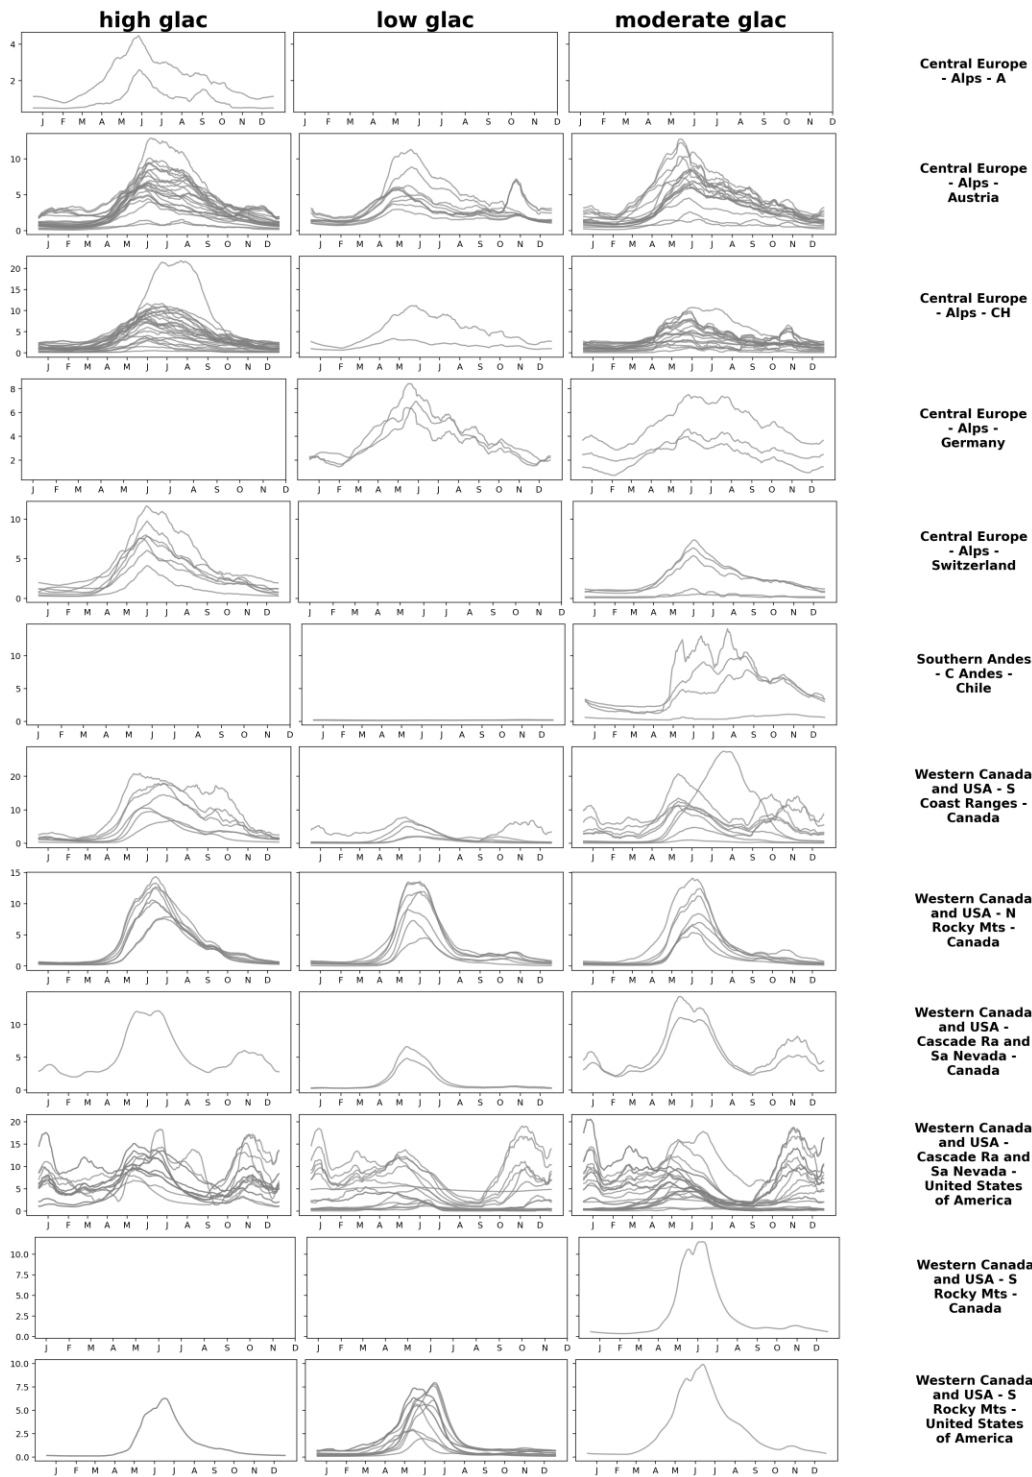

**Figure S1.** 20-day average of annual mean streamflow (mm/day) for individual G basins, grouped into four glacier-coverage classes—low (<2%), moderate (2–20%), high (20–40%), and very high (>40%)—and categorized by RGI first- and second-order regions (rows: Central Europe – various Alpine subregions; Southern Andes – C Andes – Chile; Western Canada & USA – multiple mountain ranges). Each grey line represents one basin’s January–December hydrograph.

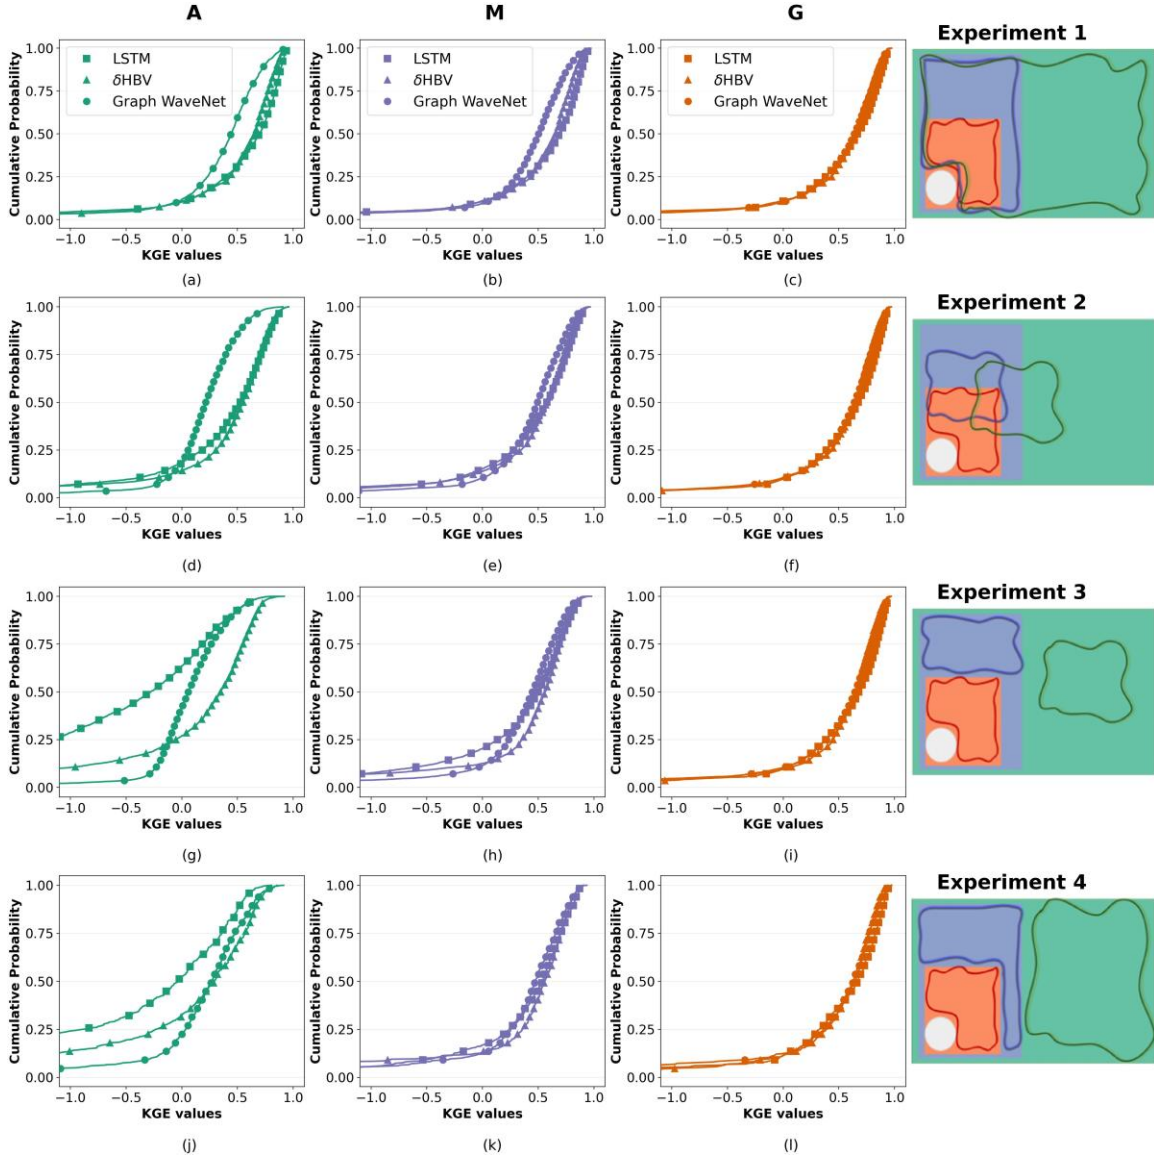

Figure S2. CDF comparison of KGE values of 3 DL model architectures trained with different partitions. Each column represents 3 different data partitions – A, M, and G respectively. Rows 1-4 showing performance for experiments 1-4 respectively. Each line of the CDF plot comprises 5600 sample points from each of the 100 trials with 56 test basins for experiments 1-3, while the lines in experiment 4 consist of 560 sample points from 10 trials with 56 test points each. \*Graph WaveNet in experiment 1 for A partition has only ~2300 samples due to excessive resource needs required to train the model.

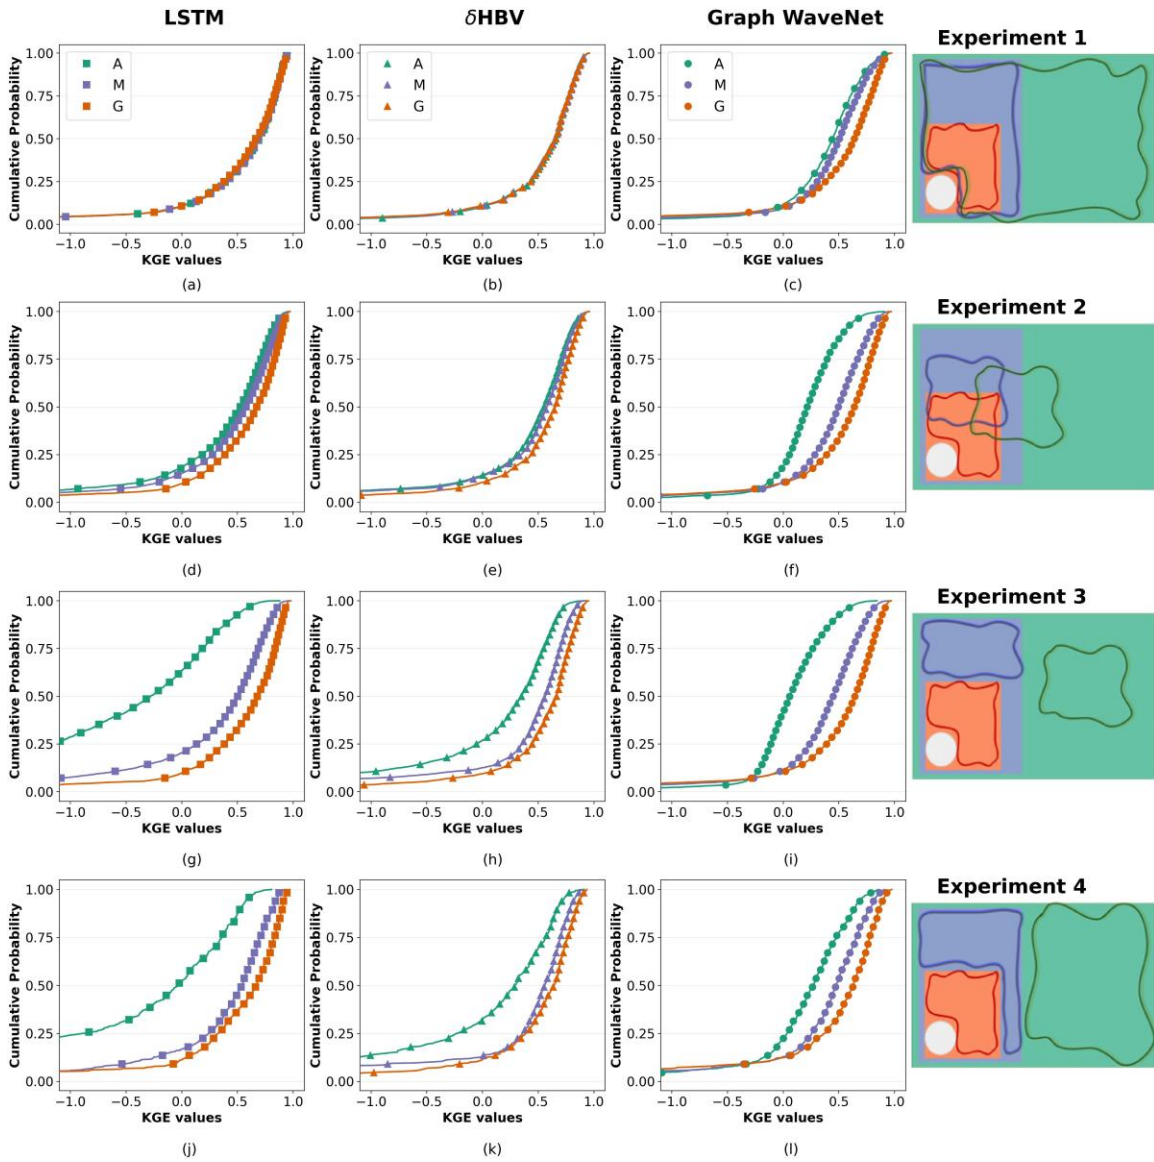

**Figure S3.** CDF comparison of KGE values of LSTM,  $\delta$ HBV and Graph WaveNet when trained with 3 different data partitions. Rows 1-4 showing performance for experiments 1-4 respectively. Each line of the CDF plot comprises 5600 sample points from each of the 100 trials with 56 test basins for experiments 1-3, while the lines in experiment 4 consist of 560 sample points from 10 trials with 56 test points each. \* Graph WaveNet in experiment 1 for A partition has only  $\sim 2300$  samples due to excessive resource needs required to train the model.

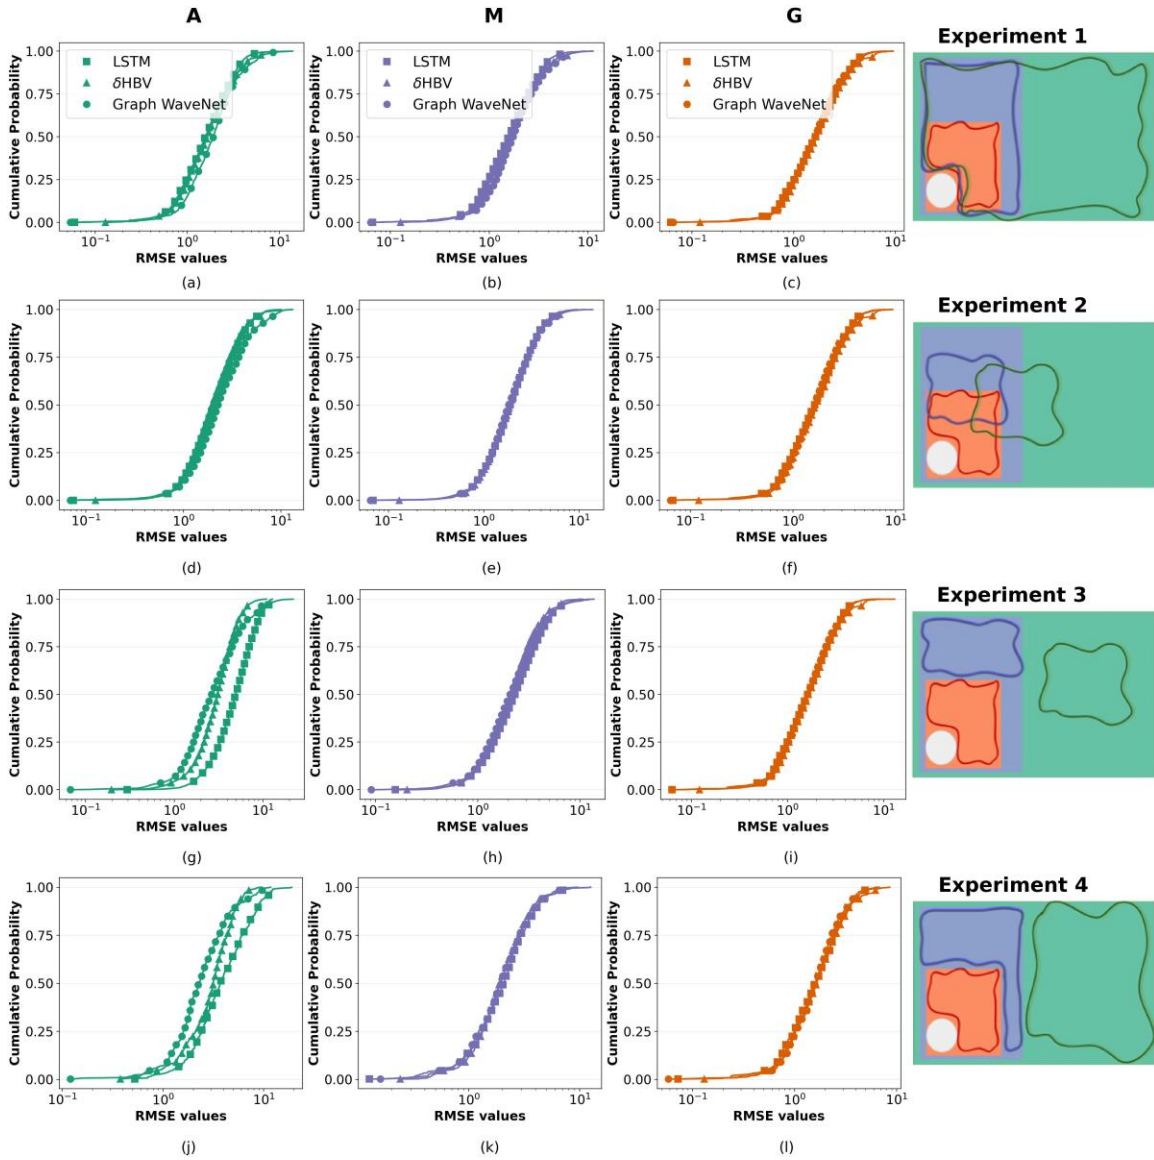

**Figure S4.** CDF comparison of RMSE values of 3 DL model architectures trained with different partitions. Each column represents 3 different data partitions – A, M, and G respectively. Rows 1-4 showing performance for experiments 1-4 respectively. Each line of the CDF plot comprises 5600 sample points from each of the 100 trials with 56 test basins for experiments 1-3, while the lines in experiment 4 consist of 560 sample points from 10 trials with 56 test points each. \*Graph WaveNet in experiment 1 for A partition has only ~2300 samples due to excessive resource needs required to train the model.

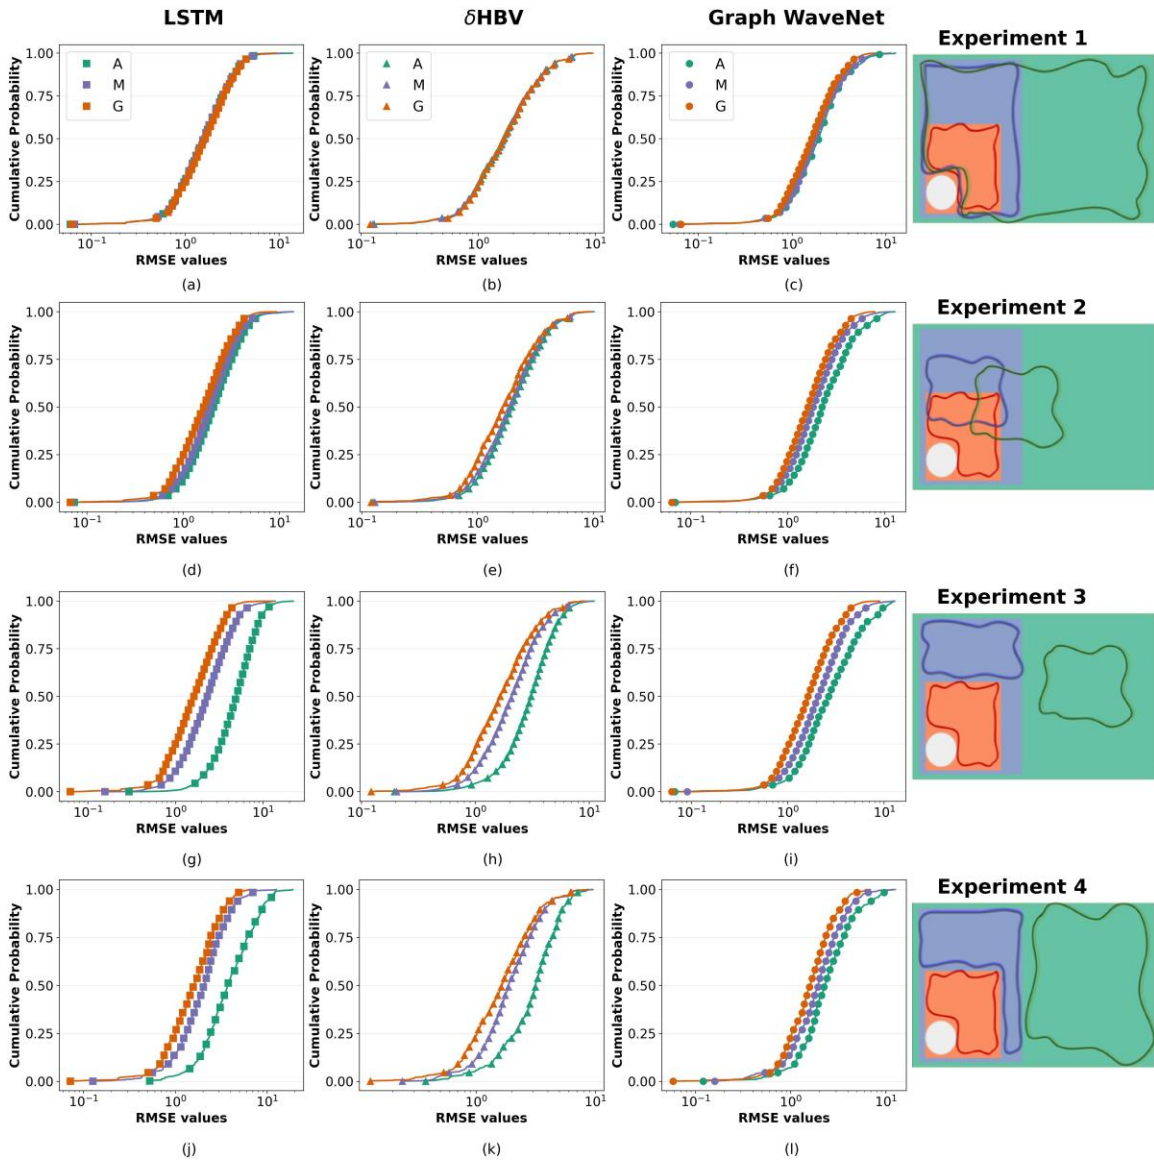

**Figure S5.** CDF comparison of RMSE values of LSTM,  $\delta$ HBV and Graph WaveNet when trained with 3 different data partitions. Rows 1-4 showing performance for experiments 1-4 respectively. Each line of the CDF plot comprises 5600 sample points from each of the 100 trials with 56 test basins for experiments 1-3, while the lines in experiment 4 consist of 560 sample points from 10 trials with 56 test points each. \* Graph WaveNet in experiment 1 for A partition has only  $\sim$ 2300 samples due to excessive resource needs required to train the model.

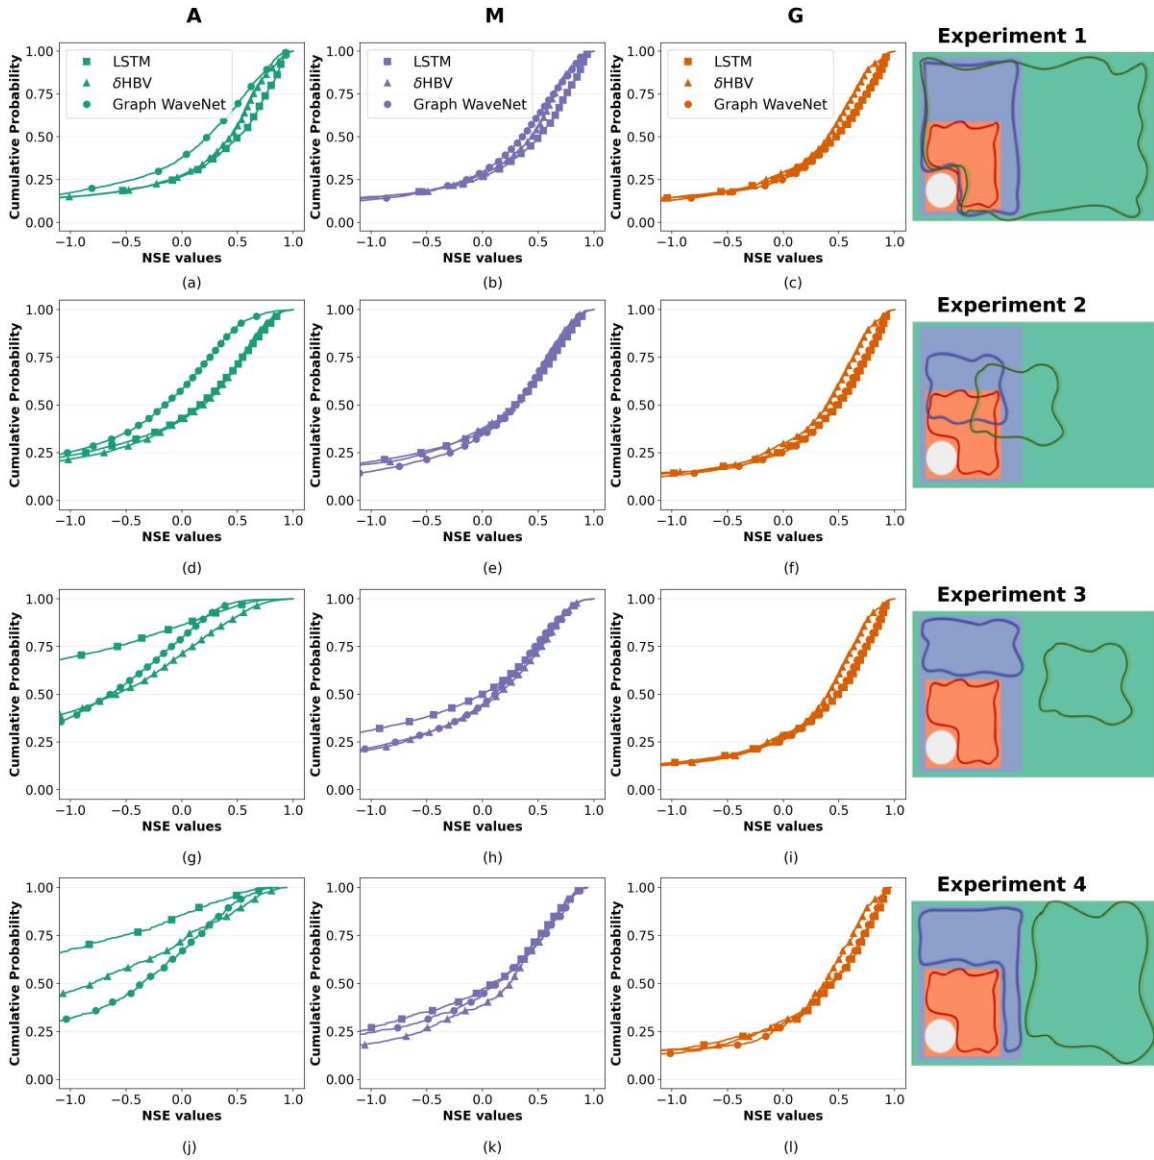

**Figure S6.** CDF comparison of NSE values of 3 DL model architectures trained with different partitions over the summer months of the test period. Each column represents 3 different data partitions – A, M, and G respectively. Rows 1-4 showing performance for experiments 1-4 respectively. Each line of the CDF plot comprises 5600 sample points from each of the 100 trials with 56 test basins for experiments 1-3, while the lines in experiment 4 consist of 560 sample points from 10 trials with 56 test points each. \*Graph WaveNet in experiment 1 for A partition has only ~2300 samples due to excessive resource needs required to train the model.

**Table S5. Median KGE Values**

|       | All Global<br>(A) |              |                  | Mixed High Mountain<br>(M) |              |                  | High Mountain with Glacier<br>(G) |              |                  |
|-------|-------------------|--------------|------------------|----------------------------|--------------|------------------|-----------------------------------|--------------|------------------|
|       | LSTM              | $\delta$ HBV | Graph<br>WaveNet | LSTM                       | $\delta$ HBV | Graph<br>WaveNet | LSTM                              | $\delta$ HBV | Graph<br>WaveNet |
| Exp 1 | <b>0.70</b>       | 0.65         | 0.44             | <b>0.69</b>                | 0.65         | 0.50             | <b>0.66</b>                       | <b>0.66</b>  | 0.64             |
| Exp 2 | 0.52              | <b>0.55</b>  | 0.21             | <b>0.58</b>                | <b>0.58</b>  | 0.49             | <b>0.67</b>                       | 0.65         | 0.64             |
| Exp 3 | 0.28              | <b>0.35</b>  | 0.06             | 0.50                       | <b>0.56</b>  | 0.45             | <b>0.68</b>                       | 0.66         | 0.64             |
| Exp 4 | 0.04              | <b>0.29</b>  | 0.27             | 0.54                       | <b>0.56</b>  | 0.47             | <b>0.67</b>                       | 0.64         | 0.63             |

**Table S6. Median RMSE Values**

|       | All Global<br>(A) |              |                  | Mixed High Mountain<br>(M) |              |                  | High Mountain with Glacier<br>(G) |              |                  |
|-------|-------------------|--------------|------------------|----------------------------|--------------|------------------|-----------------------------------|--------------|------------------|
|       | LSTM              | $\delta$ HBV | Graph<br>WaveNet | LSTM                       | $\delta$ HBV | Graph<br>WaveNet | LSTM                              | $\delta$ HBV | Graph<br>WaveNet |
| Exp 1 | <b>1.57</b>       | 1.64         | 1.91             | <b>1.57</b>                | 1.66         | 1.74             | 1.64                              | 1.66         | <b>1.61</b>      |
| Exp 2 | 2.07              | <b>1.97</b>  | 2.26             | 1.90                       | 1.88         | <b>1.82</b>      | 1.63                              | 1.66         | <b>1.61</b>      |
| Exp 3 | 4.95              | 3.10         | <b>2.64</b>      | 2.31                       | 2.09         | <b>2.07</b>      | <b>1.62</b>                       | 1.66         | <b>1.62</b>      |
| Exp 4 | 3.72              | 3.15         | <b>2.26</b>      | 2.06                       | <b>1.87</b>  | 1.94             | <b>1.59</b>                       | 1.65         | 1.60             |

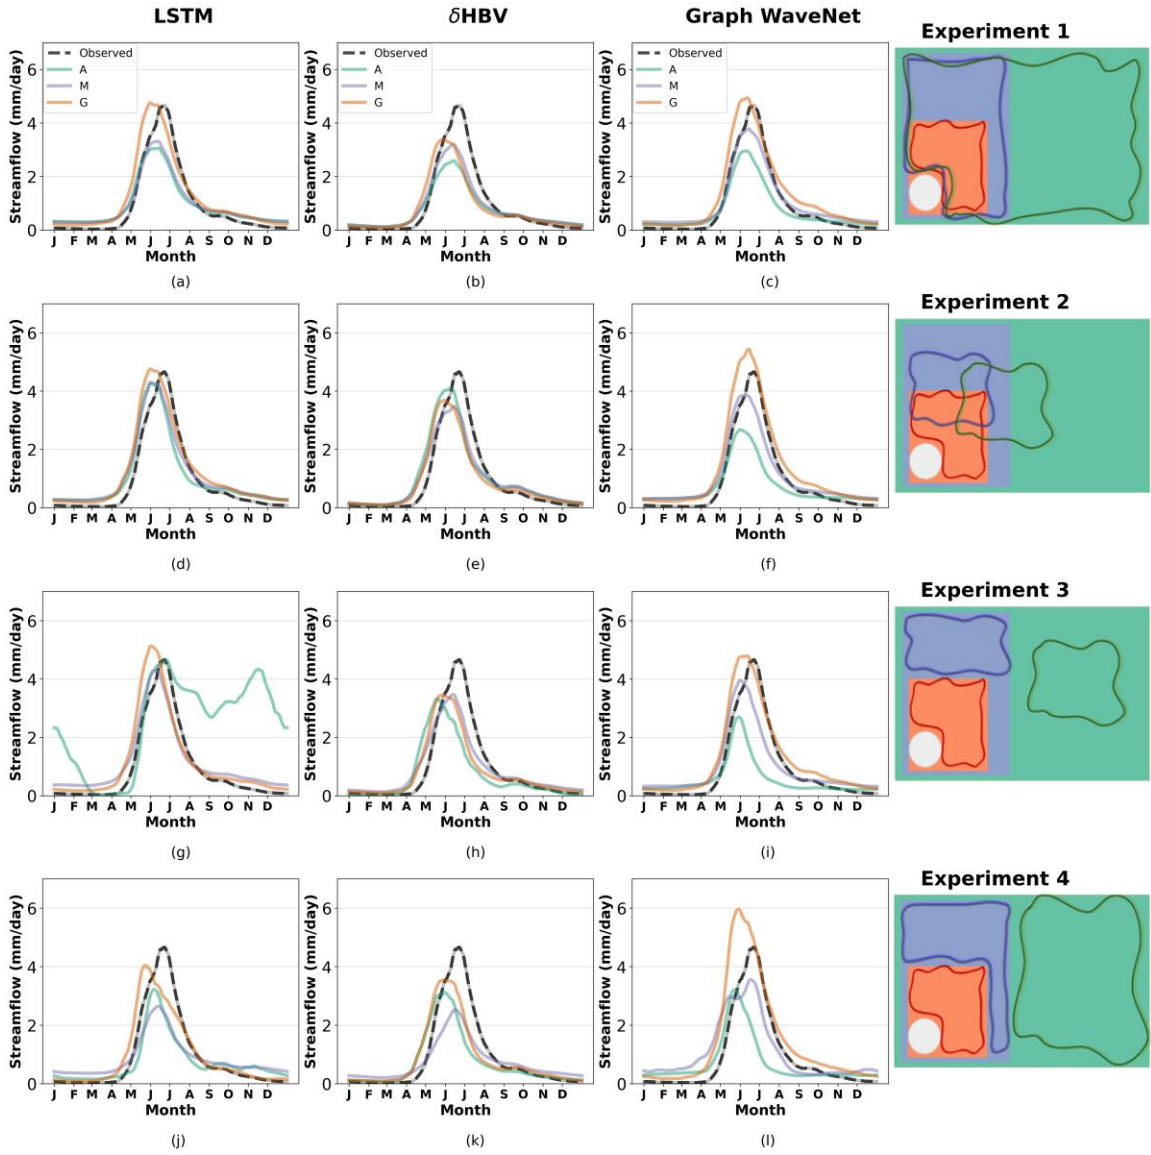

Figure S7. Observed vs. Simulated hydrograph for a low category of glacier (<2%) basin [hysets\_08NF001].

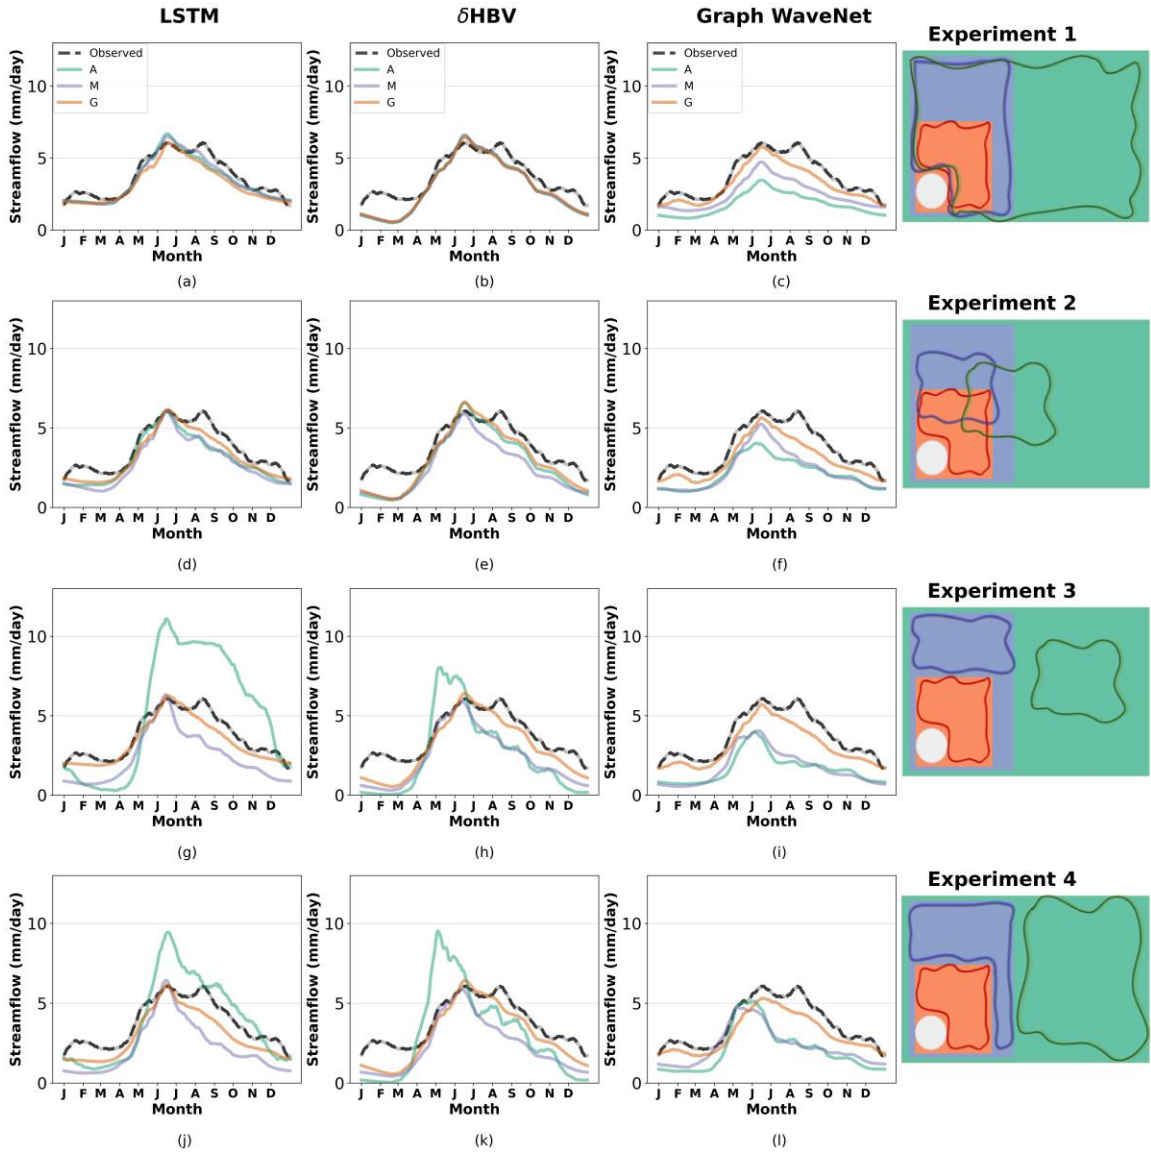

**Figure S8.** Observed vs. Simulated hydrograph for a moderate category of glacier (2-20%) basin [lamah\_201780]

### Hydrograph Plot for High (20% - 40%) Glacierized Basin

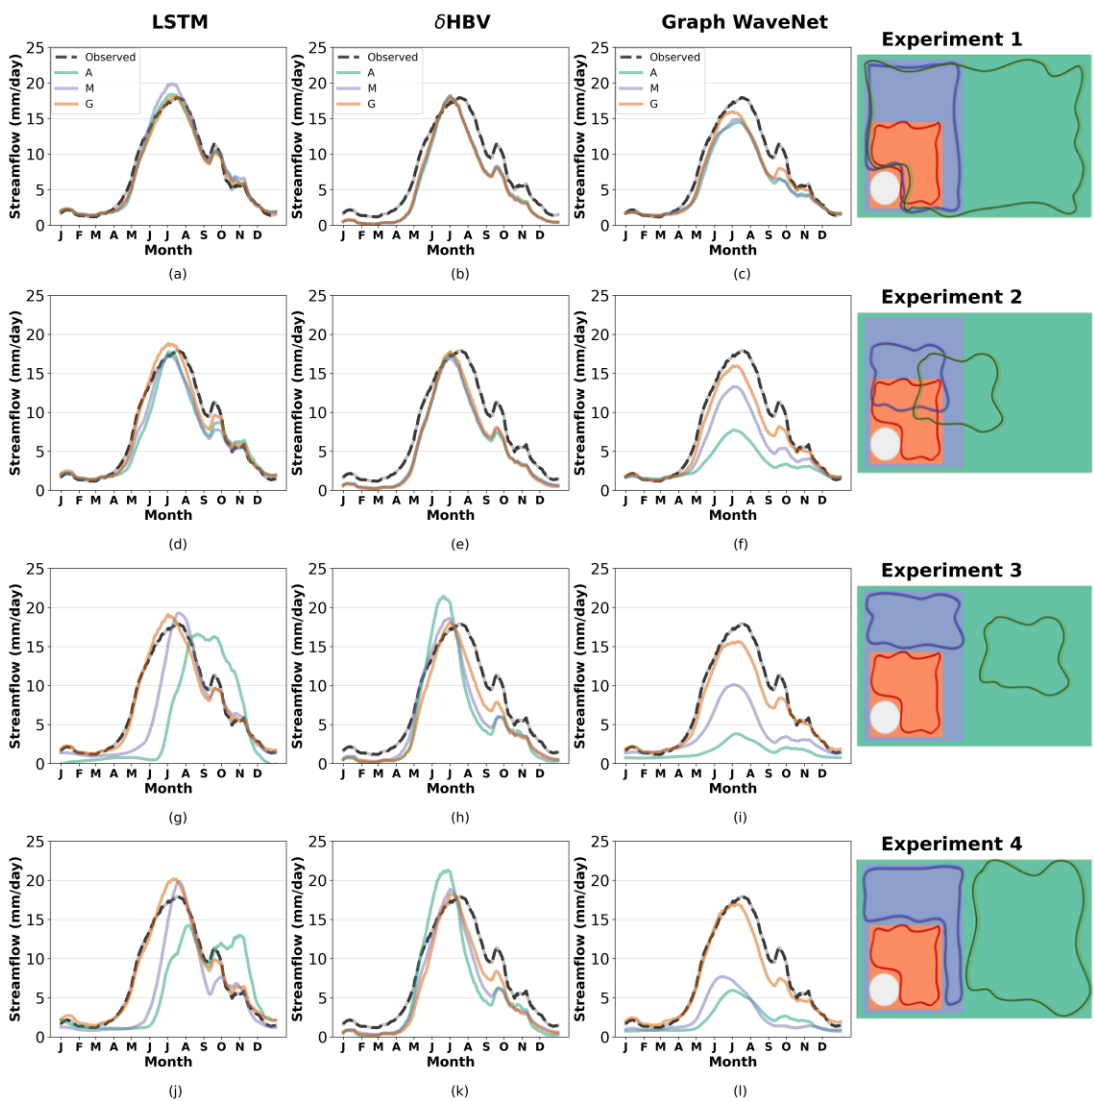

**Figure S9.** Observed vs. Simulated hydrograph for a high category of glacier (20-40%) basin [hysets\_08GA071]

### Hydrograph Plot for Very High (>40%) Glacierized Basin

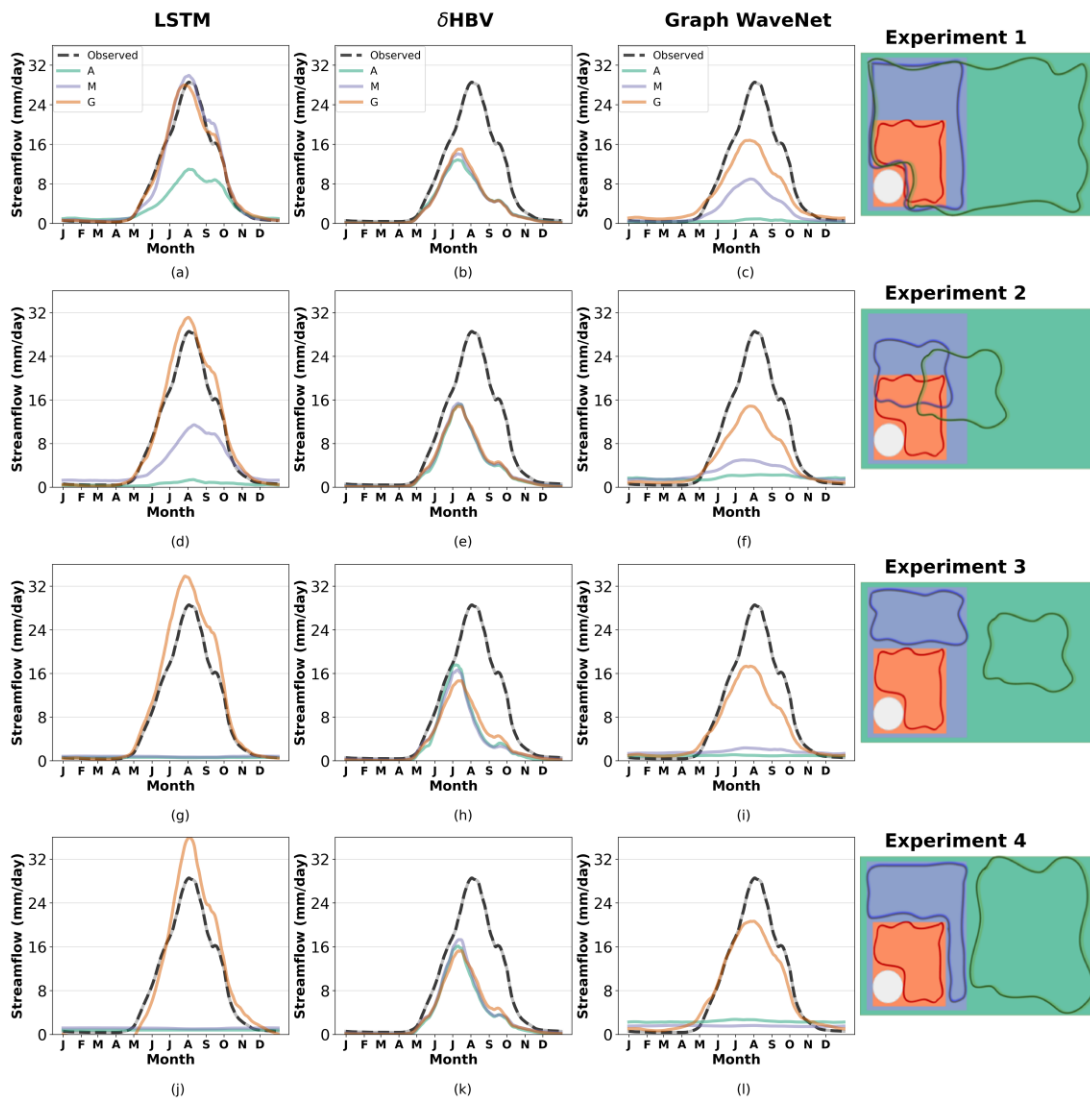

**Figure S10.** Observed vs. Simulated hydrograph for a very high category of glacier (>40%) basin [hysets\_08ME023]

## References

- Alvarez-Garreton, C., Mendoza, P. A., Boisier, J. P., Addor, N., Galleguillos, M., Zambrano-Bigiarini, M., Lara, A., Puelma, C., Cortes, G., Garreaud, R., McPhee, J., and Ayala, A.: The CAMELS-CL dataset: catchment attributes and meteorology for large sample studies – Chile dataset, *Hydrology and Earth System Sciences*, 22, 5817–5846, <https://doi.org/10.5194/hess-22-5817-2018>, 2018.
- Anon: HydroATLAS version 1.0, <https://doi.org/10.6084/m9.figshare.9890531.v1>, 2019.
- Arsenault, R., Brissette, F., Martel, J.-L., Troin, M., Lévesque, G., Davidson-Chaput, J., Gonzalez, M. C., Ameli, A., and Poulin, A.: A comprehensive, multisource database for hydrometeorological modeling of 14,425 North American watersheds, *Sci Data*, 7, 243, <https://doi.org/10.1038/s41597-020-00583-2>, 2020.
- Chagas, V. B. P., Chaffe, P. L. B., Addor, N., Fan, F. M., Fleischmann, A. S., Paiva, R. C. D., and Siqueira, V. A.: CAMELS-BR: hydrometeorological time series and landscape attributes for 897 catchments in Brazil, *Earth System Science Data*, 12, 2075–2096, <https://doi.org/10.5194/essd-12-2075-2020>, 2020.
- Coxon, G., Addor, N., Bloomfield, J. P., Freer, J., Fry, M., Hannaford, J., Howden, N. J. K., Lane, R., Lewis, M., Robinson, E. L., Wagener, T., and Woods, R.: CAMELS-GB: hydrometeorological time series and landscape attributes for 671 catchments in Great Britain, *Earth System Science Data*, 12, 2459–2483, <https://doi.org/10.5194/essd-12-2459-2020>, 2020.
- Fowler, K. J. A., Acharya, S. C., Addor, N., Chou, C., and Peel, M. C.: CAMELS-AUS: hydrometeorological time series and landscape attributes for 222 catchments in Australia, *Earth System Science Data*, 13, 3847–3867, <https://doi.org/10.5194/essd-13-3847-2021>, 2021.
- Höge, M., Kauzlaric, M., Siber, R., Schönenberger, U., Horton, P., Schwanbeck, J., Florianic, M. G., Viviroli, D., Wilhelm, S., Sikorska-Senoner, A. E., Addor, N., Brunner, M., Pool, S., Zappa, M., and Fenicia, F.: CAMELS-CH: hydro-meteorological time series and landscape attributes for 331 catchments in hydrologic Switzerland, *Earth System Science Data Discussions*, 1–46, <https://doi.org/10.5194/essd-2023-127>, 2023.
- Klingler, C., Schulz, K., and Herrnegger, M.: LamaH-CE: LARge-SaMple DATA for Hydrology and Environmental Sciences for Central Europe, *Earth System Science Data*, 13, 4529–4565, <https://doi.org/10.5194/essd-13-4529-2021>, 2021.
- Kratzert, F., Nearing, G., Addor, N., Erickson, T., Gauch, M., Gilon, O., Gudmundsson, L., Hassidim, A., Klotz, D., Nevo, S., Shalev, G., and Matias, Y.: Caravan - A global community dataset for large-sample hydrology, *Sci Data*, 10, 61, <https://doi.org/10.1038/s41597-023-01975-w>, 2023.
- Muñoz-Sabater, J., Dutra, E., Agustí-Panareda, A., Albergel, C., Arduini, G., Balsamo, G., Boussetta, S., Choulga, M., Harrigan, S., Hersbach, H., Martens, B., Miralles, D. G.,

Piles, M., Rodríguez-Fernández, N. J., Zsoter, E., Buontempo, C., and Thépaut, J.-N.: ERA5-Land: a state-of-the-art global reanalysis dataset for land applications, *Earth System Science Data*, 13, 4349–4383, <https://doi.org/10.5194/essd-13-4349-2021>, 2021.

Newman, A. J., Clark, M. P., Sampson, K., Wood, A., Hay, L. E., Bock, A., Viger, R. J., Blodgett, D., Brekke, L., Arnold, J. R., Hopson, T., and Duan, Q.: Development of a large-sample watershed-scale hydrometeorological data set for the contiguous USA: data set characteristics and assessment of regional variability in hydrologic model performance, *Hydrology and Earth System Sciences*, 19, 209–223, <https://doi.org/10.5194/hess-19-209-2015>, 2015.
